# Supplementary material for: Development and Assessment of a Gastroscopy Electronic Learning System for Primary Learners: Randomized Controlled Trial
Source: PubMed Central journal article supplement (PMC7136842; doi:10.2196/16233), 2020-03-23
Supplement: jmir_v22i3e16233_app2.pdf [file jmir_v22i3e16233_app2.pdf]

## Grading Table for Gastroscopy Examination

Candidate number: \_\_\_\_\_ Score: \_\_\_\_\_

| Examination contents                                                 |                                                                                          | Fraction | Score |
|----------------------------------------------------------------------|------------------------------------------------------------------------------------------|----------|-------|
| 1. Gastroscopy forward operation                                     | Preparation before the examination, holding gastroscopy method                           | 5        |       |
|                                                                      | Operation from oropharyngeal to esophageal entrance                                      | 5        |       |
|                                                                      | Operation through esophagus                                                              | 5        |       |
|                                                                      | Entering the body of the stomach through the cardia and fundus of the stomach            | 5        |       |
|                                                                      | Operation through gastric body and antrum                                                | 5        |       |
|                                                                      | Access to the duodenum through the pylorus                                               | 5        |       |
|                                                                      | Entering the descending segment of the duodenum through the upper corner of the duodenum | 5        |       |
| 2. Gastroscopy withdrawal observation                                | Observation of descending segment of duodenum                                            | 5        |       |
|                                                                      | Observation of duodenal bulb                                                             | 5        |       |
|                                                                      | Observation of gastric antrum                                                            | 5        |       |
|                                                                      | Observation of gastric angle                                                             | 5        |       |
|                                                                      | Observation on the fundus and cardia of stomach                                          | 5        |       |
|                                                                      | Observation of gastric body                                                              | 5        |       |
|                                                                      | Observation of esophagus and cardia                                                      | 5        |       |
| 3. Overall gastroscopy examination time and fluency                  |                                                                                          | 5        |       |
| 4. Response, comfort and satisfaction of patients during gastroscopy |                                                                                          | 5        |       |
| 5. Position and definition of collected image                        |                                                                                          | 10       |       |
| 6. Diagnostic accuracy under gastroscopy                             |                                                                                          | 10       |       |
| Total                                                                |                                                                                          | 100      |       |
| Errors or deficiencies of candidates:                                |                                                                                          |          |       |
| Signature of assessment expert:                                      |                                                                                          | Date:    |       |
