# Supplementary material for: Development and Assessment of a Gastroscopy Electronic Learning System for Primary Learners: Randomized Controlled Trial
Source: PubMed Central journal article supplement (PMC7136842; doi:10.2196/16233), 2020-03-23
Supplement: jmir_v22i3e16233_app3.pdf [file jmir_v22i3e16233_app3.pdf]

## “Gastroscope Roaming System” Satisfaction Questionnaire

In order to evaluate the learning efficiency of "Gastroscope Roaming System" software and to improve the software's shortcomings, please give a real and objective feedback after using the GRS, Please mark the selected items. Thank you for your cooperation!

Satisfaction Score: Strongly agree/Agree/Neutral/Disagree/Strongly disagree

| Number | Survey Items      | Survey Content |                                                                                    | Satisfaction Score |       |         |          |                   |
|--------|-------------------|----------------|------------------------------------------------------------------------------------|--------------------|-------|---------|----------|-------------------|
|        |                   |                |                                                                                    | Strongly agree     | Agree | Neutral | Disagree | Strongly disagree |
| A      | Content quality   | Q1             | The e-learning system provides content that exactly fits your needs.               |                    |       |         |          |                   |
|        |                   | Q2             | The e-learning system provides useful content.                                     |                    |       |         |          |                   |
|        |                   | Q3             | The e-learning system provides sufficient content.                                 |                    |       |         |          |                   |
|        |                   | Q4             | The e-learning system provides up-to-date content.                                 |                    |       |         |          |                   |
| B      | Interface quality | Q5             | The e-learning system is easy to use.                                              |                    |       |         |          |                   |
|        |                   | Q6             | The e-learning system makes it easy for you to find the content you need.          |                    |       |         |          |                   |
|        |                   | Q7             | The content provided by the e-learning system is easy to understand.               |                    |       |         |          |                   |
|        |                   | Q8             | The e-learning system is user-friendly.                                            |                    |       |         |          |                   |
|        |                   | Q9             | The operation of the e-learning system is stable.                                  |                    |       |         |          |                   |
|        |                   | Q10            | The e-learning system responds to your requests fast enough.                       |                    |       |         |          |                   |
| C      | Testing quality   | Q11            | The e-learning system makes it easy for you to evaluate your learning performance. |                    |       |         |          |                   |
|        |                   | Q12            | The testing methods provided by the e-learning system are easy to understand.      |                    |       |         |          |                   |
|        |                   | Q13            | The testing methods provided by the e-learning system are fair.                    |                    |       |         |          |                   |
|        |                   | Q14            | The e-learning system provides secure testing environments.                        |                    |       |         |          |                   |
|        |                   | Q15            | The e-learning system provides testing results promptly.                           |                    |       |         |          |                   |

|                        |                                |     |                                                                       |  |  |  |  |  |
|------------------------|--------------------------------|-----|-----------------------------------------------------------------------|--|--|--|--|--|
| <b>D</b>               | <b>Personalization quality</b> | Q16 | The e-learning system enables you to control your learning progress.  |  |  |  |  |  |
|                        |                                | Q17 | The e-learning system enables you to learn the content you need.      |  |  |  |  |  |
|                        |                                | Q18 | The e-learning system enables you to choose what you want to learn.   |  |  |  |  |  |
|                        |                                | Q19 | The e-learning system records your learning progress and performance. |  |  |  |  |  |
|                        |                                | Q20 | The e-learning system provides the personalized learning support.     |  |  |  |  |  |
| <b>E</b>               | <b>Overall quality</b>         | Q21 | As a whole, you are satisfied with the e-learning system.             |  |  |  |  |  |
|                        |                                | Q22 | As a whole, the e-learning system is successful.                      |  |  |  |  |  |
| <b>Other comments:</b> |                                |     |                                                                       |  |  |  |  |  |
